# Supplementary material for: Integrative metabonomics as potential method for diagnosis of thyroid malignancy
Source: PubMed Central journal article supplement (PMC4613561; doi:10.1038/srep14869), 2015-10-21
Supplement: srep14869-s1.pdf [file srep14869-s1.pdf]

## Integrative metabolomics as potential method for diagnosis of thyroid malignancy

Yuan Tian<sup>†ζ</sup>, Xiu Nie<sup>‡ζ</sup>, Shan Xu<sup>†</sup>, Yan Li<sup>‡</sup>, Tao Huang<sup>‡\*</sup>, Huiru Tang<sup>Φ\*</sup>, Yulan Wang<sup>†#\*</sup>

<sup>†</sup>CAS Key Laboratory of Magnetic Resonance in Biological Systems, State Key Laboratory of Magnetic Resonance and Atomic and Molecular Physics, National Centre for Magnetic Resonance in Wuhan, Wuhan Institute of Physics and Mathematics, University of Chinese Academy of Sciences, Wuhan, 430071, P. R. China

<sup>‡</sup>Department of Pathology, Union Hospital, Tongji Medical College, Huazhong University of Science and Technology, Wuhan, 430022, P.R. China

<sup>Φ</sup>State Key Laboratory of Genetic Engineering, Collaborative Innovation Center for Genetics and Development, Metabolomics and Systems Biology Laboratory, School of Life Sciences, Fudan University, Shanghai, 200433, P. R. China.

<sup>#</sup>Collaborative Innovation Center for Diagnosis and Treatment of Infectious Diseases, Hangzhou, 310058, P. R. China.

### Supplementary Files

**Table S1.** NMR assignment for the metabolites found in thyroid tissues

| no. | metabolites | moieties                                             | $\delta^1\text{H}$ (ppm) and multiplicity <sup>a</sup> | $\delta^{13}\text{C}$ (ppm) |
|-----|-------------|------------------------------------------------------|--------------------------------------------------------|-----------------------------|
| 1   | lipid       | $\text{CH}_3(\text{CH}_2)_n$                         | 0.86(t)                                                | 15.0                        |
|     |             | $\text{CH}_3\text{CH}_2\text{CH}_2\text{C}=\text{C}$ | 0.88(t)                                                | 15.0                        |
|     |             | $(\text{CH}_2)_n$                                    | 1.27(m)                                                | 32.0                        |
|     |             | $\text{CH}_2\text{CH}_2\text{CO}$                    | 1.57(m)                                                | 27.5                        |
|     |             | $\text{CH}_2\text{C}=\text{C}$                       | 2.01(m)                                                | 29.5                        |
|     |             | $\text{CH}_2\text{CO}$                               | 2.23(m)                                                | 36.0                        |
|     |             | $\text{C}=\text{CCH}_2\text{C}=\text{C}$             | 2.76(m)                                                | 28.5                        |
|     |             | $-\text{CH}=\text{CH}-$                              | 5.30(m)                                                | 130.0                       |
| 2   | isoleucine  | $\delta\text{CH}_3$                                  | 0.94(t)                                                | 14.2                        |
|     |             | $\gamma\text{CH}_3$                                  | 1.02(d)                                                | 17.2                        |
|     |             | $\gamma\text{CH}_2$                                  | 1.26(m)                                                | 27.5                        |
|     |             | $\gamma'\text{CH}_2$                                 | 1.48(m)                                                | 27.5                        |
|     |             | $\beta\text{CH}$                                     | 1.98(m)                                                | 37.7                        |
|     |             | $\alpha\text{CH}$                                    | 3.67(d)                                                | 62.4                        |
| 3   | leucine     | $\delta\text{CH}_3$                                  | 0.96(d)                                                | 24.5                        |

|    |                  |                       |         |       |
|----|------------------|-----------------------|---------|-------|
|    |                  | $\delta\text{CH}_3$   | 0.97(d) | 24.2  |
|    |                  | $\gamma\text{CH}$     | 1.72(m) | 27.0  |
|    |                  | $\beta\text{CH}_2$    | 1.72(m) | 42.6  |
|    |                  | $\alpha\text{CH}$     | 3.74(t) | 57.2  |
| 4  | valine           | $\gamma\text{CH}_3$   | 0.99(d) | 19.6  |
|    |                  | $\gamma\text{CH}_3$   | 1.04(d) | 20.8  |
|    |                  | $\beta\text{CH}$      | 2.27(m) | 32.6  |
|    |                  | $\alpha\text{CH}$     | 3.62(d) | 63.3  |
| 5  | lactate          | $\text{CH}_3$         | 1.33(d) | 22.9  |
|    |                  | $\text{CH}$           | 4.11(q) | 71.3  |
| 6  | threonine        | $\gamma\text{CH}_3$   | 1.33(d) | 22.5  |
|    |                  | $\alpha\text{CH}$     | 3.59(d) | 63.1  |
|    |                  | $\beta\text{CH}$      | 4.26(m) | 69.0  |
| 7  | alanine          | $\beta\text{CH}_3$    | 1.48(d) | 19.0  |
|    |                  | $\alpha\text{CH}$     | 3.79(q) | 53.4  |
| 8  | lysine           | $\gamma\text{CH}_2$   | 1.48(m) | 24.1  |
|    |                  | $\delta\text{CH}_2$   | 1.72(m) | 29.2  |
|    |                  | $\beta\text{CH}_2$    | 1.90(m) | 33.0  |
|    |                  | $\epsilon\text{CH}_2$ | 3.03(t) | 42.2  |
|    |                  | $\alpha\text{CH}$     | 3.76(t) | 57.6  |
| 9  | arginine         | $\gamma\text{CH}_2$   | 1.73(m) | 27.0  |
|    |                  | $\beta\text{CH}_2$    | 1.93(m) | 30.6  |
|    |                  | $\delta\text{CH}_2$   | 3.23(t) | 43.4  |
|    |                  | $\alpha\text{CH}$     | 3.75(t) | 57.6  |
|    |                  | $\text{C}=\text{NH}$  |         | 159.6 |
| 10 | acetate          | $\text{CH}_3$         | 1.92(s) | 26.2  |
| 11 | glutamate        | $\beta\text{CH}_2$    | 2.09(m) | 29.9  |
|    |                  | $\beta'\text{CH}_2$   | 2.10(m) | 29.9  |
|    |                  | $\gamma\text{CH}_2$   | 2.36(m) | 36.4  |
|    |                  | $\alpha\text{CH}$     | 3.77(m) | 57.2  |
| 12 | methionine       | $\delta\text{CH}_3$   | 2.14(s) | 16.8  |
|    |                  | $\beta\text{CH}_2$    | 2.16(m) | 33.0  |
|    |                  | $\gamma\text{CH}_2$   | 2.65(t) | 31.7  |
|    |                  | $\alpha\text{CH}$     | 3.86(m) | 56.9  |
| 13 | glutamine        | $\beta\text{CH}_2$    | 2.10(m) | 30.0  |
|    |                  | $\gamma\text{CH}_2$   | 2.46(m) | 33.8  |
|    |                  | $\alpha\text{CH}$     | 3.77(m) | 57.5  |
| 14 | aspartate        | $\beta\text{CH}_2$    | 2.68(m) | 39.5  |
|    |                  | $\beta'\text{CH}_2$   | 2.82(m) | 39.8  |
|    |                  | $\alpha\text{CH}$     | 3.91(m) | 55.3  |
| 15 | glutathione(GSH) | $3\text{CH}_2$        | 2.17(m) | #     |
|    |                  | $4\text{CH}_2$        | 2.56(m) | #     |
|    |                  | $12\text{CH}_2$       | 2.94(m) | #     |
|    |                  | $12'\text{CH}_2$      | 2.97(m) | #     |

|    |                            |                                  |          |       |
|----|----------------------------|----------------------------------|----------|-------|
|    |                            | 2CH                              | 3.79(t)  | #     |
|    |                            | 7CH                              | 4.56(t)  | #     |
| 16 | choline                    | N(CH <sub>3</sub> ) <sub>3</sub> | 3.21(s)  | 56.8  |
|    |                            | NCH <sub>2</sub>                 | 3.52(m)  | 74.1  |
|    |                            | OCH <sub>2</sub>                 | 4.07(m)  | 54.1  |
| 17 | phosphocholine(PC)         | N(CH <sub>3</sub> ) <sub>3</sub> | 3.23(s)  | 57.0  |
|    |                            | NCH <sub>2</sub>                 | 3.61(m)  | 69.3  |
|    |                            | OCH <sub>2</sub>                 | 4.17(m)  | 58.0  |
| 18 | glycerophosphocholine(GPC) | N(CH <sub>3</sub> ) <sub>3</sub> | 3.23(s)  | 57.0  |
|    |                            | NCH <sub>2</sub>                 | 3.69(m)  | 69.0  |
|    |                            | OCH <sub>2</sub>                 | 4.34(m)  | 62.7  |
| 19 | taurine                    | CH <sub>2</sub> SO <sub>3</sub>  | 3.28(t)  | 50.7  |
|    |                            | NCH <sub>2</sub>                 | 3.43(t)  | 38.2  |
| 20 | <i>scyllo</i> -inositol    | CH <sub>3</sub>                  | 3.35(s)  | 76.6  |
| 21 | <i>myo</i> -inositol       | 5CH                              | 3.27(t)  | 77.2  |
|    |                            | 1CH,3CH                          | 3.54(m)  | 74.2  |
|    |                            | 4CH,6CH                          | 3.63(m)  | 75.3  |
|    |                            | 2CH                              | 4.07(m)  | 75.1  |
| 22 | glycine                    | CH <sub>2</sub>                  | 3.56(s)  | 44.3  |
| 23 | phosphoethanolamine(PE)    | CH <sub>2</sub> NH <sub>3</sub>  | 3.23(t)  | 43.8  |
|    |                            | CH <sub>2</sub> OH               | 3.99(m)  | 63.1  |
| 24 | inosine                    | CH <sub>2</sub>                  | 3.85(dd) | 63.8  |
|    |                            | 'CH <sub>2</sub>                 | 3.92(dd) | 63.8  |
|    |                            | 5H'                              | 4.28(q)  | 88.6  |
|    |                            | 4H'                              | 4.44(t)  | 73.4  |
|    |                            | 2H'                              | 6.11(d)  | 91.1  |
|    |                            | 8H                               | 8.25(s)  | 149.8 |
|    |                            | 2H                               | 8.36(s)  | 143.2 |
| 25 | tyrosine                   | βCH <sub>2</sub>                 | 3.06(dd) | 38.3  |
|    |                            | β'CH <sub>2</sub>                | 3.15(dd) | 38.3  |
|    |                            | αCH                              | 3.94(dd) | 59.2  |
|    |                            | 3 or 5CH                         | 6.91(d)  | 118.9 |
|    |                            | 2 or 6CH                         | 7.20(d)  | 133.8 |
| 26 | phenylalanine              | βCH <sub>2</sub>                 | 3.13(dd) | 38.4  |
|    |                            | β'CH <sub>2</sub>                | 3.29(dd) | 38.4  |
|    |                            | αCH                              | 3.98(dd) | 59.3  |
|    |                            | 2 or 6CH                         | 7.33(m)  | 132.1 |
|    |                            | 4CH                              | 7.38(m)  | 131.2 |
|    |                            | 3 or 5CH                         | 7.43(m)  | 132.2 |
| 27 | histidine                  | 5CH                              | 7.09(s)  | 120.1 |
|    |                            | 3CH                              | 7.83(s)  | 138.3 |
| 28 | fumarate                   | CH                               | 6.52(s)  | 138.5 |
| 29 | uracil                     | CH                               | 5.81(d)  | 100.9 |
|    |                            | CH                               | 7.54(d)  | 146.5 |

|    |              |                  |          |       |
|----|--------------|------------------|----------|-------|
| 30 | guanosine    | CH               | 8.01(s)  | #     |
| 31 | hypoxanthine | 2CH              | 8.20(s)  | 148.6 |
|    |              | 7CH              | 8.22(s)  | 145.0 |
| 32 | xanthine     | CH               | 7.94(s)  | 139.1 |
| 33 | formate      | CH               | 8.45(s)  | #     |
| 34 | acetamide    | CH <sub>3</sub>  | 2.02(s)  | 24.7  |
| 35 | succinate    | CH <sub>2</sub>  | 2.41(s)  | 37.0  |
| 36 | citrate      | CH <sub>2</sub>  | 2.54(d)  | 46.5  |
|    |              | 'CH <sub>2</sub> | 2.66(d)  | 46.5  |
| 37 | uridine      | 'CH <sub>2</sub> | 3.92(d)  | 64.3  |
|    |              | 4H'              | 4.14(dd) | 86.6  |
|    |              | 3H'              | 4.24(dd) | 73.1  |
|    |              | 2H'              | 4.36(dd) | 78.0  |
|    |              | 5H               | 5.91(d)  | 95.0  |
|    |              | 6H               | 5.92(d)  | 90.5  |
|    |              | 1H'              | 7.89(d)  | 144.0 |
|    |              | 38               | U1       |       |

---

**Table S2.** Summary of OPLS-DA models<sup>a</sup>.

|                  | intact thyroid tissue |                       |                       |                       | tissue aqueous extracts |                      |                      |                      |
|------------------|-----------------------|-----------------------|-----------------------|-----------------------|-------------------------|----------------------|----------------------|----------------------|
|                  | A vs. (B+C)           | A vs. B               | B vs. C               | A vs. C               | A vs. (B+C)             | A vs. B              | B vs. C              | A vs. C              |
| R <sup>2</sup> X | 0.28                  | 0.33                  | 0.16                  | 0.35                  | 0.78                    | 0.82                 | 0.77                 | 0.73                 |
| Q <sup>2</sup>   | 0.75                  | 0.81                  | 0.77                  | 0.77                  | 0.33                    | 0.31                 | 0.44                 | 0.49                 |
| <i>p</i>         | 3.9×10 <sup>-25</sup> | 1.5×10 <sup>-22</sup> | 4.7×10 <sup>-14</sup> | 1.1×10 <sup>-20</sup> | 8.1×10 <sup>-6</sup>    | 1.0×10 <sup>-3</sup> | 1.3×10 <sup>-4</sup> | 7.3×10 <sup>-7</sup> |

<sup>a</sup>A: healthy adjacent thyroid tissue, B: benign thyroid lesions, C: malignant thyroid lesions.

**Table S3.** Fatty acid compositions in thyroid tissues.

|                        | Healthy <sup>a</sup><br>(n = 25) | Benign<br>(n = 25) | Malignant<br>(n = 15) | p values<br>(healthy vs benign ) | p values<br>(healthy vs malignant ) | p values<br>(benign vs malignant ) |
|------------------------|----------------------------------|--------------------|-----------------------|----------------------------------|-------------------------------------|------------------------------------|
| SFA <sup>b</sup>       | 23.343±8.423                     | 30.412±4.751       | 35.377±9.423          | 1.63E-2                          | 2.02E-2                             | 3.08E-1                            |
| C14:0                  | 0.443±0.191                      | 0.247±0.049        | 0.462±0.127           | 4.48E-3                          | 8.43E-1                             | 1.82E-2                            |
| C16:0                  | 13.005±4.115                     | 15.193±2.558       | 19.159±4.081          | 4.94E-2                          | 1.30E-2                             | 6.93E-3                            |
| C18:0                  | 6.681±1.029                      | 15.083±2.020       | 15.550±6.164          | 1.21E-12                         | 4.89E-3                             | 8.75E-1                            |
| C20:0                  | 0.133±0.039                      | 0.146±0.031        | 0.207±0.078           | 2.51E-1                          | 1.00E-1                             | 1.59E-1                            |
| UFA <sup>b</sup>       | 26.445±10.818                    | 17.739±6.759       | 26.651±17.083         | 3.66E-3                          | 9.76E-1                             | 3.11E-1                            |
| MUFA <sup>b</sup>      | 13.415±6.655                     | 5.913±2.558        | 8.210±4.780           | 2.45E-3                          | 1.74E-1                             | 4.11E-1                            |
| C16:1n7                | 0.665±0.452                      | 0.075±0.026        | 0.187±0.200           | 8.61E-4                          | 6.35E-2                             | 3.46E-1                            |
| C18:1n7                | 1.186±0.411                      | 1.112±0.385        | 1.599±1.031           | 6.15E-1                          | 4.31E-1                             | 3.53E-1                            |
| C18:1n9                | 11.031±5.679                     | 4.024±1.698        | 6.568±3.960           | 1.28E-3                          | 1.71E-1                             | 2.90E-1                            |
| C20:1n9                | 0.291±0.071                      | 0.184±0.056        | 0.320±0.152           | 1.26E-5                          | 6.00E-1                             | 1.73E-1                            |
| PUFA <sup>b</sup>      | 13.030±4.360                     | 11.827±4.709       | 14.240±6.921          | 4.54E-1                          | 6.66E-1                             | 3.33E-1                            |
| n6 <sup>b</sup>        | 11.979±4.145                     | 10.832±4.449       | 12.834±6.647          | 4.51E-1                          | 7.49E-1                             | 3.96E-1                            |
| C18:2n6                | 8.967±4.651                      | 6.372±2.654        | 6.621±3.226           | 9.15E-2                          | 3.70E-1                             | 8.65E-1                            |
| C20:2n6                | 0.180±0.052                      | 0.182±0.090        | 0.239±0.143           | 9.49E-1                          | 4.75E-1                             | 2.84E-1                            |
| C20:3n6                | 0.361±0.075                      | 0.642±0.339        | 0.436±0.086           | 2.97E-4                          | 1.23E-1                             | 1.57E-2                            |
| C20:4n6                | 2.446±0.721                      | 3.267±1.106        | 2.575±0.930           | 2.61E-2                          | 7.60E-1                             | 2.04E-1                            |
| n3 <sup>b</sup>        | 1.051±0.306                      | 0.995±0.366        | 1.406±0.402           | 6.43E-1                          | 6.52E-2                             | 2.97E-2                            |
| C18:3n3                | 0.719±0.295                      | 0.486±0.070        | 0.865±0.267           | 2.01E-2                          | 3.54E-1                             | 3.32E-2                            |
| C22:6n3                | 0.269±0.034                      | 0.539±0.312        | 0.540±0.299           | 1.04E-4                          | 1.12E-1                             | 9.94E-1                            |
| ToFA <sup>b</sup>      | 62.029±12.976                    | 47.414±10.629      | 49.788±14.968         | 1.20E-2                          | 4.63E-2                             | 5.48E-1                            |
| n6/n3 <sup>b</sup>     | 11.663±3.017                     | 9.874±0.630        | 7.689±2.052           | 6.66E-1                          | 2.94E-2                             | 1.22E-1                            |
| PUFA/UFA <sup>b</sup>  | 0.509±0.070                      | 0.690±0.020        | 0.579±0.028           | 1.47E-6                          | 1.22E-1                             | 1.35E-8                            |
| MUFA/UFA <sup>b</sup>  | 0.491±0.070                      | 0.310±0.020        | 0.421±0.028           | 1.47E-6                          | 1.22E-1                             | 1.35E-8                            |
| PUFA/MUFA <sup>b</sup> | 0.904±0.109                      | 2.214±0.246        | 1.244±0.306           | 3.84E-19                         | 1.08E-2                             | 2.20E-07                           |
| PUFA/ToFA <sup>b</sup> | 0.262±0.047                      | 0.252±0.051        | 0.221±0.066           | 5.70E-1                          | 1.66E-1                             | 2.46E-1                            |
| MUFA/ToFA <sup>b</sup> | 0.264±0.089                      | 0.109±0.019        | 0.136±0.058           | 7.90E-5                          | 1.86E-2                             | 4.28E-1                            |
| SFA/ToFA <sup>b</sup>  | 0.473±0.127                      | 0.628±0.068        | 0.665±0.107           | 1.41E-3                          | 1.72E-2                             | 3.56E-1                            |
| UFA/ToFA <sup>b</sup>  | 0.527±0.127                      | 0.372±0.068        | 0.335±0.107           | 1.41E-3                          | 1.72E-2                             | 3.56E-1                            |
| SFA/UFA <sup>b</sup>   | 1.020±0.559                      | 1.687±0.506        | 1.351±0.683           | 8.26E-4                          | 3.47E-1                             | 2.46E-1                            |
| SCD16 <sup>c</sup>     | 0.053±0.035                      | 0.005±0.001        | 0.009±0.009           | 5.13E-4                          | 1.26E-3                             | 3.69E-1                            |
| SCD18 <sup>c</sup>     | 1.459±1.033                      | 0.255±0.090        | 0.372±0.203           | 1.96E-3                          | 4.29E-3                             | 3.34E-1                            |
| D5D <sup>c</sup>       | 5.817±0.834                      | 5.466±1.193        | 4.835±0.865           | 4.04E-1                          | 5.33E-2                             | 2.75E-1                            |
| D6D <sup>c</sup>       | 0.058±0.048                      | 0.098±0.034        | 0.081±0.045           | 2.00E-3                          | 2.78E-1                             | 3.28E-1                            |

<sup>a</sup> data are presented as mean ±SD (μmol/g)

<sup>b</sup> SFA: saturated fatty acids; UFA: unsaturated fatty acids; MUFA: monounsaturated fatty acids; PUFA: polyunsaturated fatty acids; n6: n6 PUFA ; n3: n3 PUFA ;ToFA: total fatty acids; n6/n3: n6-to-n3 ratio; PUFA/UFA:

PUFA-to-UFA ratio; MUFA/UFA: MUFA-to-UFA ratio; PUFA/MUFA: PUFA-to-MUFA ratio; PUFA/ToFA: PUFA-to-ToFA ratio; MUFA/ToFA: MUFA-to-ToFA ratio; SFA/ToFA: SFA-to-ToFA ratio; UFA/ToFA: UFA-to-ToFA ratio; SFA/UFA: SFA-to-UFA ratio; SFA = C14:0+C16:0+C18:0+C20:0; UFA = MUFA+PUFA; MUFA = C16:1n7+C18:1n7+C18:1n9+C20:1n9; PUFA = n6+n3; n6 = C18:2n6+C18:3n6+C20:2n6+C20:3n6+C20:4n6 ; n3 = C18:3n3+C20:5n3+C22:6n3

<sup>c</sup> SCD16: stearyl-CoA desaturase-16; SCD18: stearyl-CoA desaturase-18; D5D: Δ5-desaturase; D6D: Δ6-desaturase. Hepatic desaturase were calculated by product-precursor ratio. SCD16 = C16:1n7/C16:0; SCD18 = C18:1n9/C18:0 ; D5D = C20:4n6/C20:3n6 ; D6D = C20:3n6/C18:2n6
